# Supplementary material for: Relationship between spatially heterogeneous reaction dynamics and photochemical kinetics in single crystals of anthracene derivatives
Source: Royal Society of Chemistry journal article supplement (doi:10.1039/d4sc03060e), 2024-01-01
Supplement: d4sc03060e1.pdf [file d4sc03060e1.pdf]

## Supporting Information

### **Relationship between spatially heterogeneous reaction dynamics and photochemical kinetics in single crystals of anthracene derivatives**

Sogo Kataoka,<sup>a</sup> Daichi Kitagawa,<sup>\*a</sup> Hikaru Sotome,<sup>b</sup> Syoji Ito,<sup>b</sup> Hiroshi Miyasaka,<sup>b</sup> Christopher J. Bardeen,<sup>\*c</sup> and Seiya Kobatake<sup>\*a</sup>

<sup>a</sup>Department of Chemistry and Bioengineering,  
Graduate School of Engineering, Osaka Metropolitan University  
3-3-138 Sugimoto, Sumiyoshi-ku  
Osaka, 558-8585 (Japan)

<sup>b</sup>Division of Frontier Materials Science and Center for Promotion of Advanced Interdisciplinary  
Research, Graduate School of Engineering Science, Osaka University  
1-3 Machikaneyama-cho, Toyonaka, Osaka 560-8531 (Japan)

<sup>c</sup>Department of Chemistry  
University of California, Riverside  
501 Big Springs Road  
Riverside, CA 92521 (USA)

\*E-mail: [kitagawa@omu.ac.jp](mailto:kitagawa@omu.ac.jp); [christob@ucr.edu](mailto:christob@ucr.edu); [kobatake@omu.ac.jp](mailto:kobatake@omu.ac.jp)

## **Table of Contents for supporting videos.**

**Movie S1.** Associated with Figure 2a.

**Movie S2.** Associated with Figure 2b.

**Movie S3.** Associated with Figure 2c.

**Movie S4.** Associated with Figure 2d.

**Movie S5.** Fluorescence intensity change of **9MA** single crystal

**Movie S6.** Fluorescence intensity change of **9AcA** single crystal

**Movie S7.** Fluorescence intensity change of **9CA** single crystal

**Movie S8.** Fluorescence intensity change of **9AA** single crystal

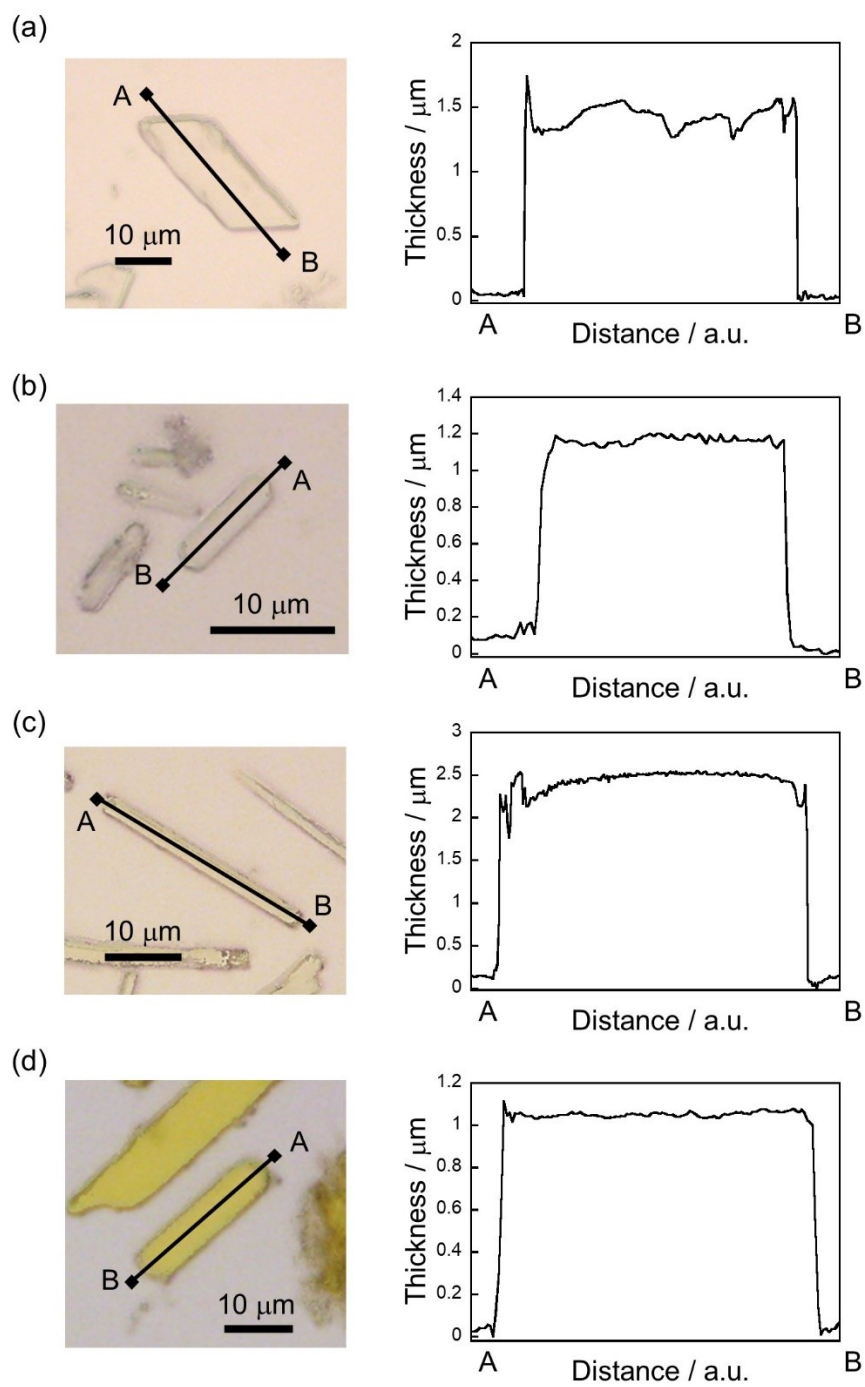

**Fig. S1.** Profiles of crystal thickness for (a) 9MA, (b) 9AcA, (c) 9CA, and (d) 9AA.

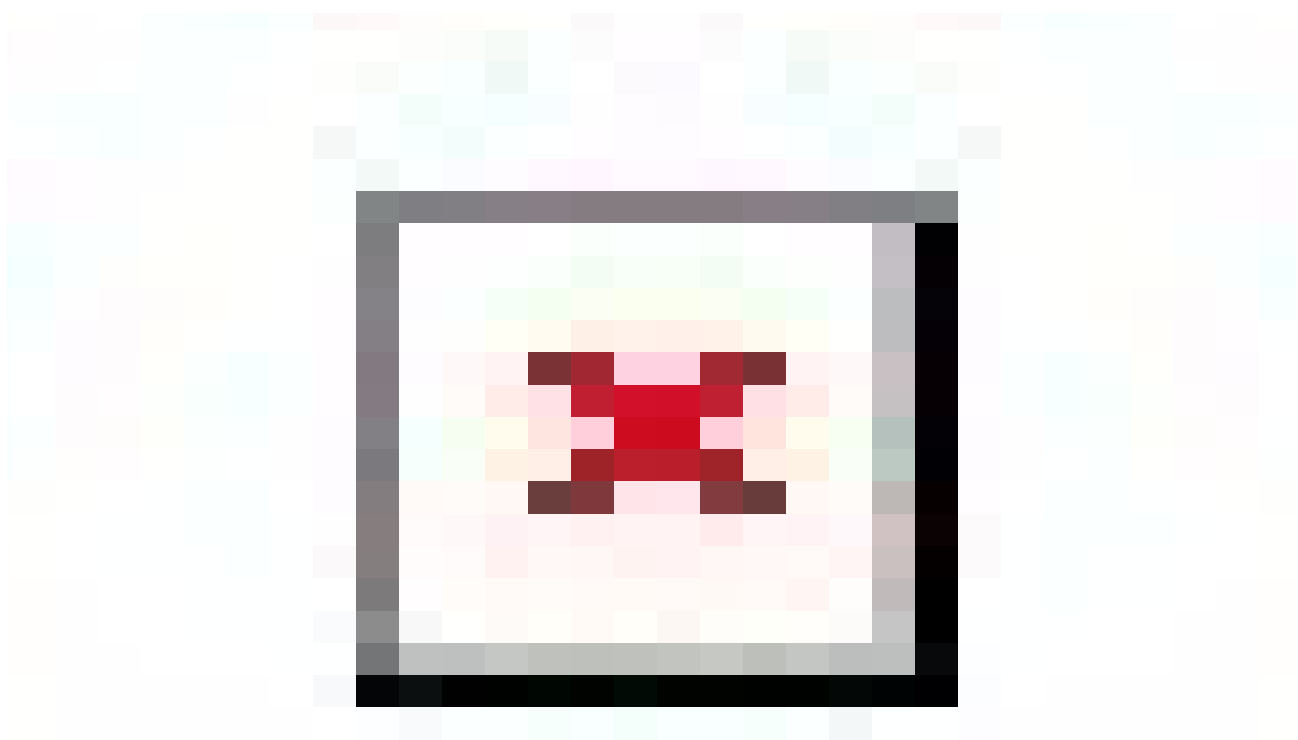

**Fig. S2** PXRD pattern calculated from single crystal X-ray crystallographic data (black line), the pattern of powder crystals (red line), and the pattern of single crystals (blue line) for (a) **9MA**, (b) **9AcA**, (c) **9CA**, and (d) **9AA**.

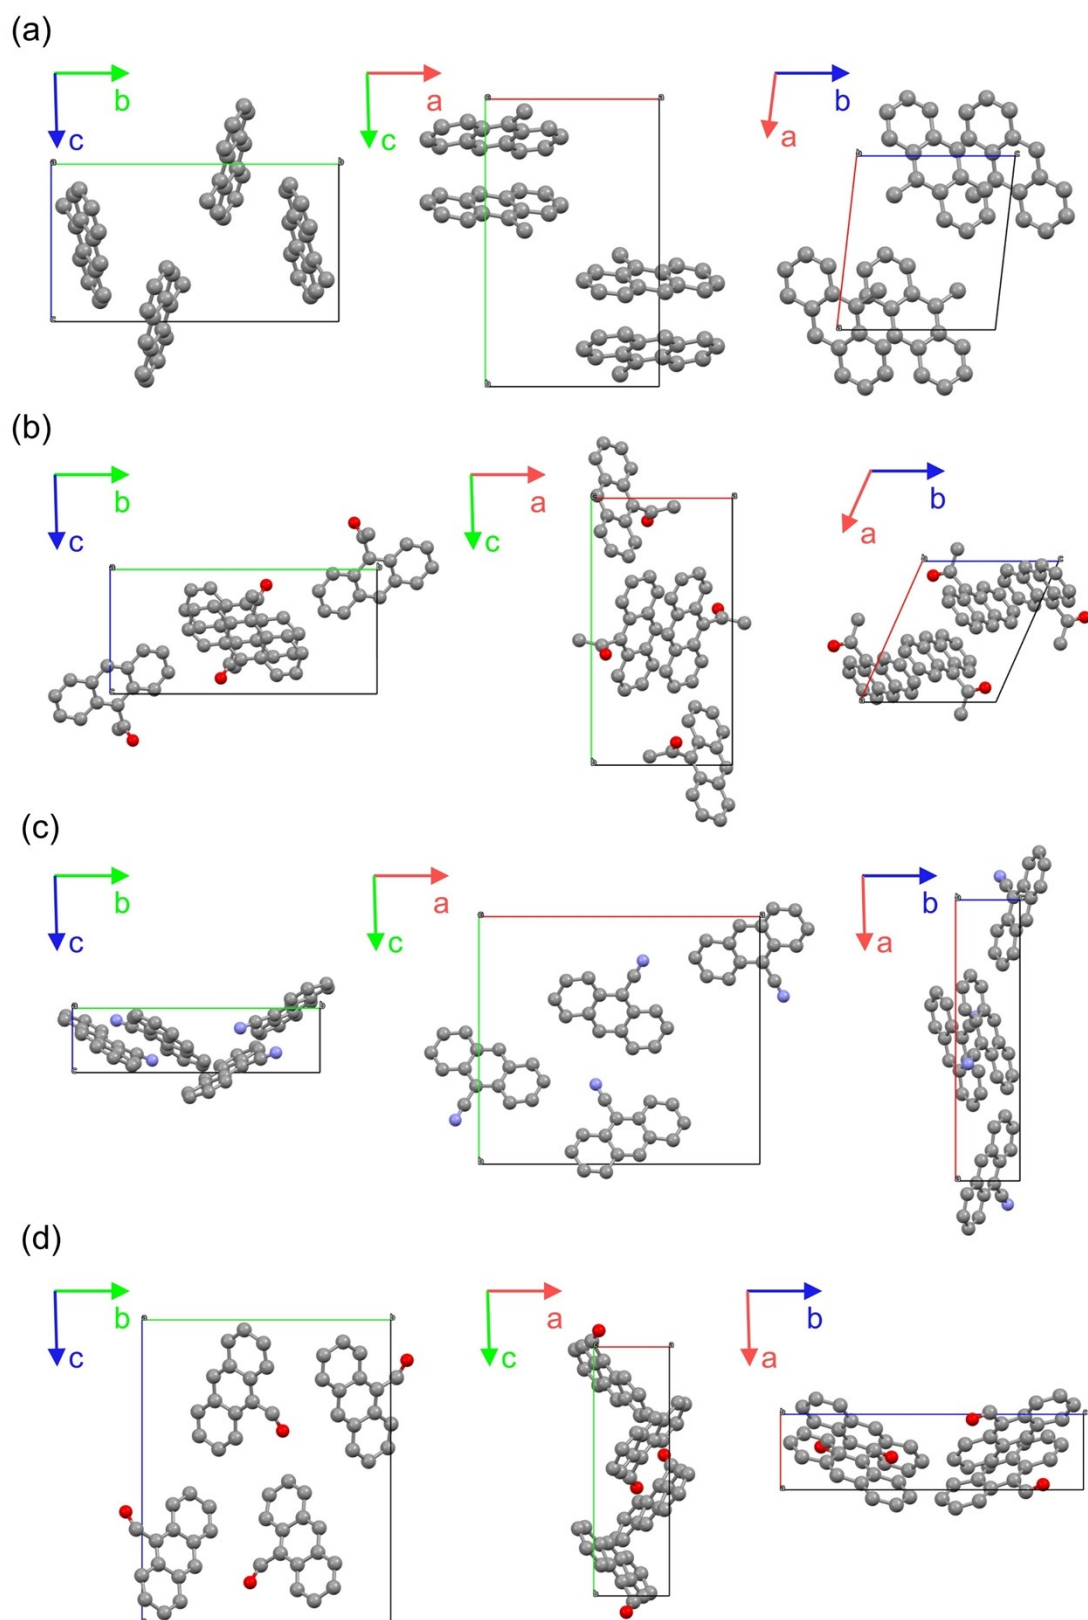

**Fig. S3** Molecular packing diagrams for crystals of (a) 9MA, (b) 9AcA, (c) 9CA, and (d) 9AA.

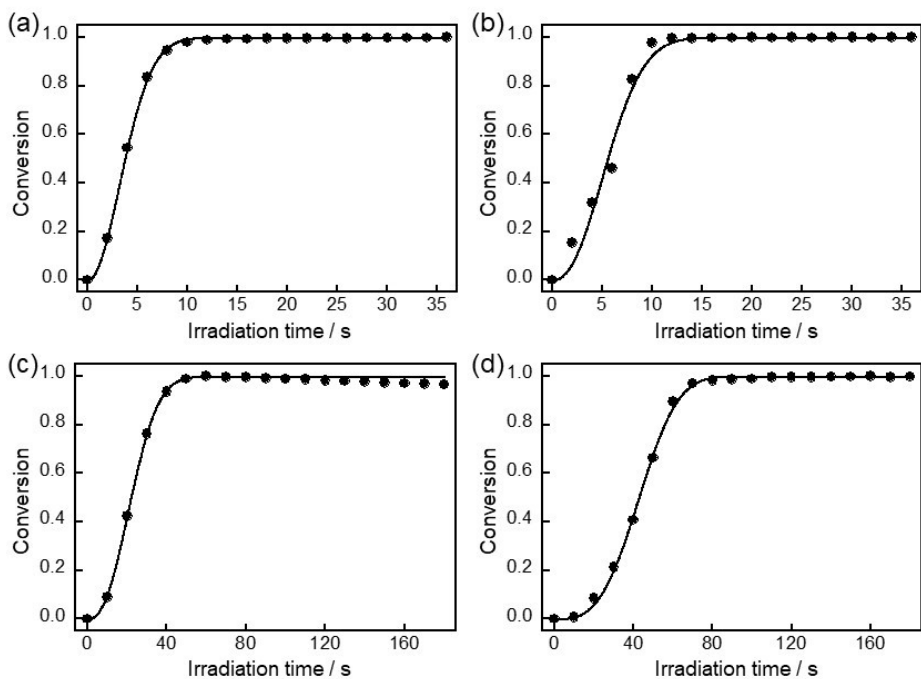

**Fig. S4** Fitting of the change in conversion calculated from absorbance decay profiles of (a) **9MA** (sample 1), (b) **9AcA** (sample 4), (c) **9CA** (sample 7), and (d) **9AA** (sample 10) using Eq. (1).

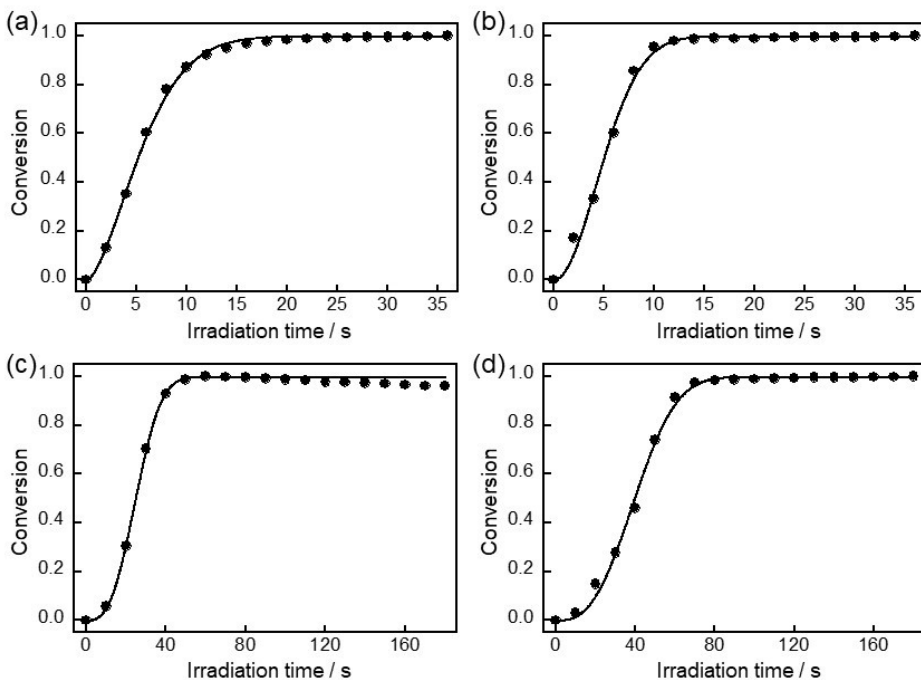

**Fig. S5** Fitting of the change in conversion calculated from absorbance decay profiles of (a) **9MA** (sample 2), (b) **9AcA** (sample 5), (c) **9CA** (sample 8), and (d) **9AA** (sample 11) using Eq. (1).

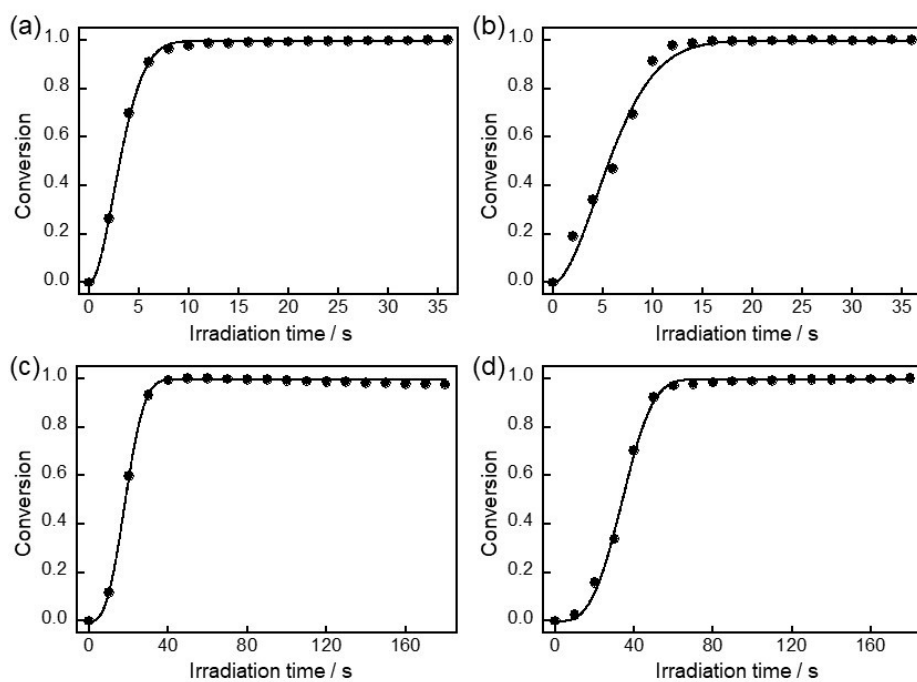

**Fig. S6** Fitting of the change in conversion calculated from absorbance decay profiles of (a) **9MA** (sample 3), (b) **9AcA** (sample 6), (c) **9CA** (sample 9), and (d) **9AA** (sample 12) using Eq. (1).

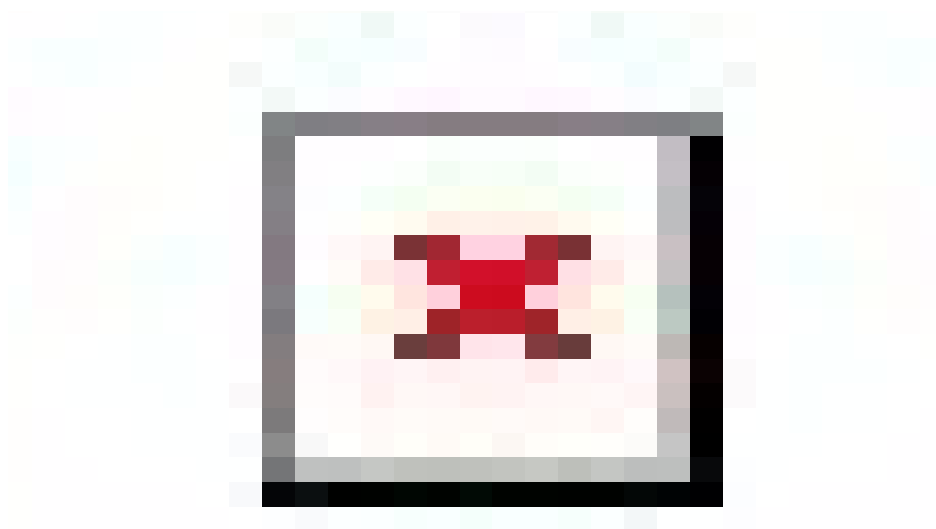

**Fig. S7** Fitting of the absorbance decay profiles of (a) **9MA** (sample 1), (b) **9AcA** (sample 4), (c) **9CA** (sample 7), and (d) **9AA** (sample 10) using Eq. (3).

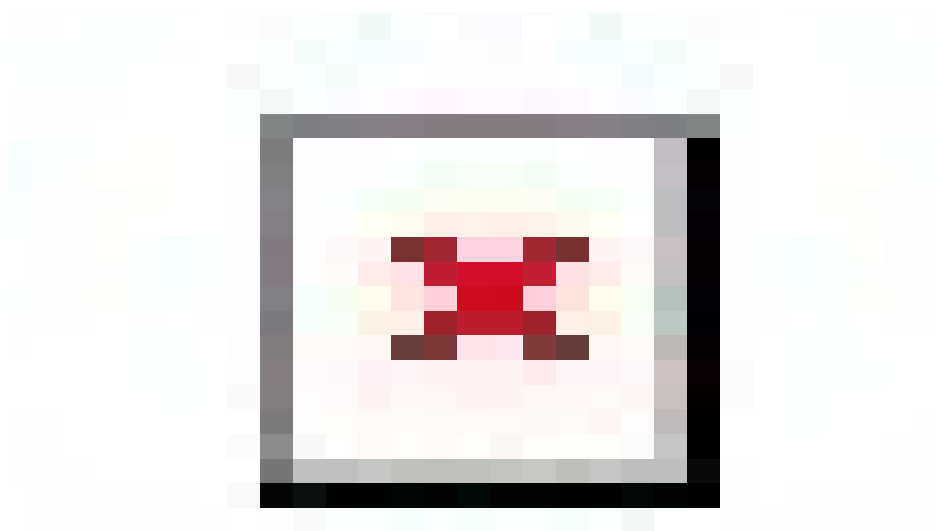

**Fig. S8** Fitting of the absorbance decay profiles of (a) **9MA** (sample 2), (b) **9AcA** (sample 5), (c) **9CA** (sample 8), and (d) **9AA** (sample 11) using Eq. (3).

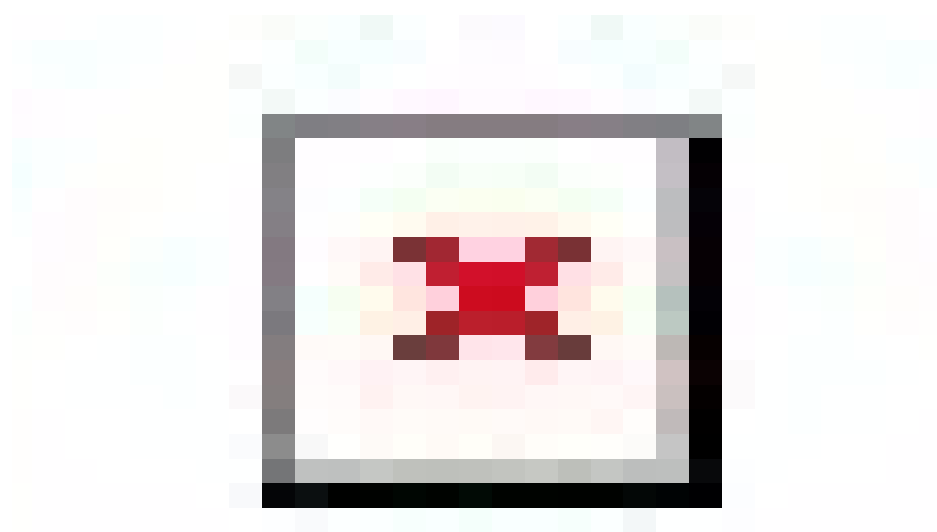

**Fig. S9** Fitting of the absorbance decay profiles of (a) **9MA** (sample 3), (b) **9AcA** (sample 6), (c) **9CA** (sample 9), and (d) **9AA** (sample 12) using Eq. (3).
